# Supplementary material
Source: ML conference proceedings conference paper supplement (https://www.ecva.net/papers/eccv_2020/papers_ECCV/html/123690256_ECCV_2020_paper.php)
Supplement: Supplementary file 1 [file 123690256-supp.zip]

# Supplementary Material for “BIRNAT: Bidirectional Recurrent Neural Networks with Adversarial Training for Video Snapshot Compressive Imaging”

Ziheng Cheng<sup>1</sup>[0000-0002-7504-197X], Ruiying Lu<sup>1</sup>[0000-0002-8825-6064],  
Zhengjue Wang<sup>1</sup>[0000-0002-1846-495X], Hao Zhang<sup>1</sup>[0000-0002-2928-2692],  
Bo Chen<sup>1\*</sup>[0000-0001-5151-9388], Ziyi Meng<sup>2,3</sup>[0000-0001-8294-8847], and  
Xin Yuan<sup>4\*</sup>[0000-0002-8311-7524]

<sup>1</sup> National Laboratory of Radar Signal Processing, Xidian University, Xi'an, China

<sup>2</sup> Beijing University of Posts and Telecommunications, Beijing, China

<sup>3</sup> New Jersey Institute of Technology, NJ, USA <sup>4</sup> Nokia Bell Labs, NJ, USA

zhcheng@stu.xidian.edu.cn,

{ruiyinglu\_xidian,zhengjuewang,zhanghao\_xidian}@163.com,

bchen@mail.xidian.edu.cn,mengziyi@bupt.edu.cn,xyuan@bell-labs.com

## 1 Experiment Settings

The details of network architecture for BIRNAT is shown in Fig.1 (Fig. 3 in the main paper, reproduced here) and Table 1, where the output size corresponds to a mini-batch, and the activation function is LeakyReLU. As displayed in the table, the ‘*conv.*’ refers to the convolutional operation and ‘*deconv.*’ denotes the deconvolutional operations, and a ‘*resblock*’ represents three two-layer convolutional layers with three residual connections. Moreover, the architecture of forward RNN is the same as backward RNN, while the parameters are not shared.

The details of our repurposed U-net architecture in the experiment is shown in Fig. 2.

---

\* corresponding author.

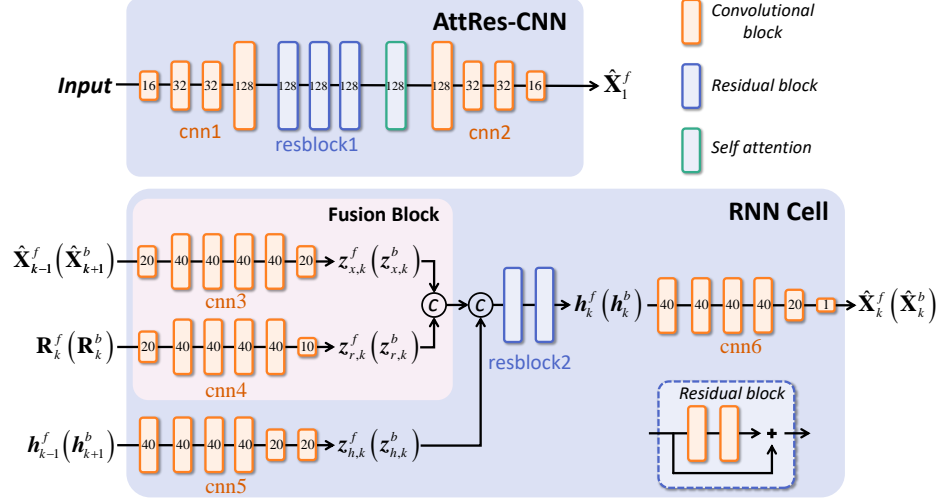

**Fig. 1.** Details of BIRNAT.  $C$  denotes concatenation along the 3<sup>rd</sup> (temporal) dimension. The numbers in the AttRes-CNN and RNN cell denote the numbers of channels in each feature map.

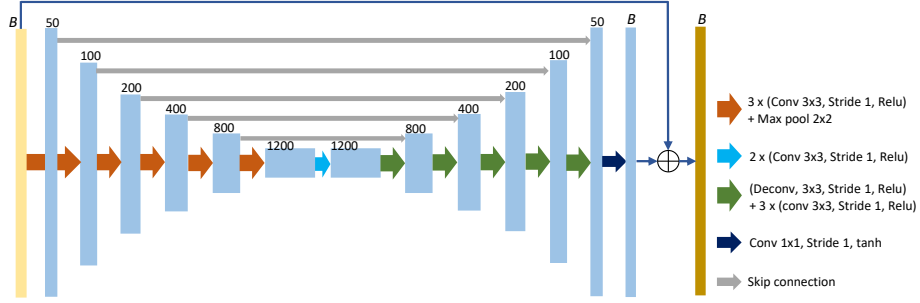

**Fig. 2.** The network architecture of the U-net in our experiments.



**Table 1.** Network architecture for the BIRNAT

| Module         | Operation                  | Kernel                                                                          | Stride     | Output Size                 |                             |
|----------------|----------------------------|---------------------------------------------------------------------------------|------------|-----------------------------|-----------------------------|
| cnn1           | conv.                      | $5 \times 5$                                                                    | 1          | $256 \times 256 \times 16$  |                             |
|                | conv.                      | $3 \times 3$                                                                    | 1          | $256 \times 256 \times 32$  |                             |
|                | conv.                      | $1 \times 1$                                                                    | 1          | $256 \times 256 \times 32$  |                             |
|                | conv.                      | $3 \times 3$                                                                    | 2          | $128 \times 128 \times 128$ |                             |
| cnn2           | deconv.                    | $3 \times 3$                                                                    | 2          | $256 \times 256 \times 32$  |                             |
|                | conv.                      | $3 \times 3$                                                                    | 1          | $256 \times 256 \times 32$  |                             |
|                | conv.                      | $1 \times 1$                                                                    | 1          | $256 \times 256 \times 16$  |                             |
|                | conv.                      | $3 \times 3$                                                                    | 1          | $256 \times 256 \times 1$   |                             |
| cnn3           | conv.                      | $5 \times 5$                                                                    | 1          | $256 \times 256 \times 20$  |                             |
|                | conv.                      | $1 \times 1$                                                                    | 1          | $256 \times 256 \times 40$  |                             |
|                | conv.                      | $3 \times 3$                                                                    | 1          | $256 \times 256 \times 40$  |                             |
|                | conv.                      | $1 \times 1$                                                                    | 1          | $256 \times 256 \times 40$  |                             |
|                | conv.                      | $3 \times 3$                                                                    | 1          | $256 \times 256 \times 40$  |                             |
|                | conv.                      | $3 \times 3$                                                                    | 1          | $256 \times 256 \times 20$  |                             |
| cnn4           | conv.                      | $5 \times 5$                                                                    | 1          | $256 \times 256 \times 20$  |                             |
|                | conv.                      | $1 \times 1$                                                                    | 1          | $256 \times 256 \times 40$  |                             |
|                | conv.                      | $3 \times 3$                                                                    | 2          | $128 \times 128 \times 40$  |                             |
|                | conv.                      | $1 \times 1$                                                                    | 1          | $128 \times 128 \times 40$  |                             |
|                | conv.                      | $3 \times 3$                                                                    | 1          | $128 \times 128 \times 40$  |                             |
|                | deconv.                    | $3 \times 3$                                                                    | 2          | $256 \times 256 \times 10$  |                             |
| cnn5           | conv.                      | $3 \times 3$                                                                    | 1          | $256 \times 256 \times 40$  |                             |
|                | conv.                      | $1 \times 1$                                                                    | 1          | $256 \times 256 \times 40$  |                             |
|                | conv.                      | $3 \times 3$                                                                    | 1          | $256 \times 256 \times 40$  |                             |
|                | conv.                      | $1 \times 1$                                                                    | 1          | $256 \times 256 \times 40$  |                             |
|                | conv.                      | $3 \times 3$                                                                    | 1          | $256 \times 256 \times 20$  |                             |
|                | conv.                      | $3 \times 3$                                                                    | 1          | $256 \times 256 \times 20$  |                             |
| cnn6           | conv.                      | $3 \times 3$                                                                    | 1          | $256 \times 256 \times 40$  |                             |
|                | conv.                      | $1 \times 1$                                                                    | 1          | $256 \times 256 \times 40$  |                             |
|                | conv.                      | $3 \times 3$                                                                    | 1          | $256 \times 256 \times 40$  |                             |
|                | conv.                      | $1 \times 1$                                                                    | 1          | $256 \times 256 \times 40$  |                             |
|                | conv.                      | $3 \times 3$                                                                    | 1          | $256 \times 256 \times 20$  |                             |
|                | conv.                      | $1 \times 1$                                                                    | 1          | $256 \times 256 \times 1$   |                             |
| resblock1      | $3 \times \text{resblock}$ | <div><div><math>3 \times 3</math></div><div><math>3 \times 3</math></div></div> | $\times 3$ | 1                           | $128 \times 128 \times 128$ |
| resblock2      | $2 \times \text{resblock}$ | <div><div><math>3 \times 3</math></div><div><math>3 \times 3</math></div></div> | $\times 3$ | 1                           | $256 \times 256 \times 50$  |
| self-attention | $\boldsymbol{w}_1$         | $1 \times 1$                                                                    | 1          | $128 \times 128 \times 16$  |                             |
|                | $\boldsymbol{w}_2$         | $1 \times 1$                                                                    | 1          | $128 \times 128 \times 16$  |                             |
|                | $\boldsymbol{w}_3$         | $1 \times 1$                                                                    | 1          | $128 \times 128 \times 128$ |                             |

## 2 More Experimental Results

We show additional experimental results of the proposed framework on the simulated data and real data captured by SCI cameras. As a further illustration of the results shown in the main paper, we show the whole reconstructed frames of **Kobe**, **Traffic**, **Runner**, **Drop**, **Aerial** and **Vehicle** using four different methods compared with ground truth from Fig.3 to Fig.24.

We also show the reconstructed images using four different methods on the real data **Wheel**, **Handlen**, **Duominuo** and **Water Balloon** from Fig.25 to Fig.28.

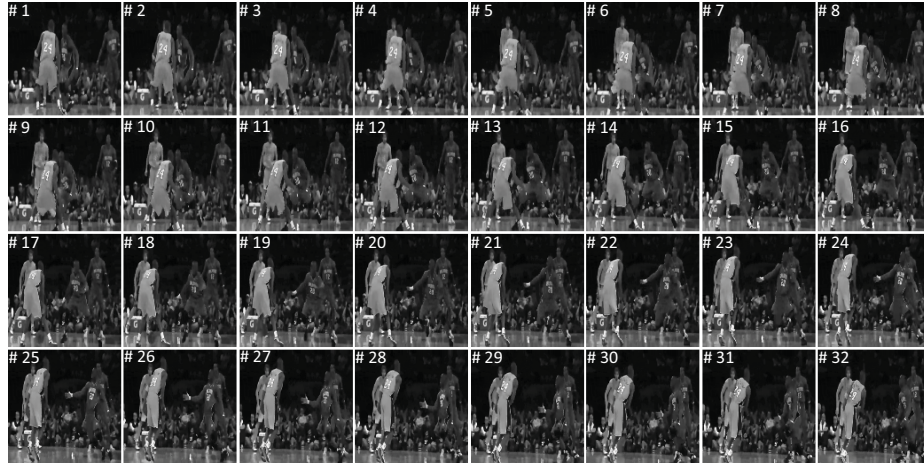

**Fig. 3.** Ground truth for Kobe.

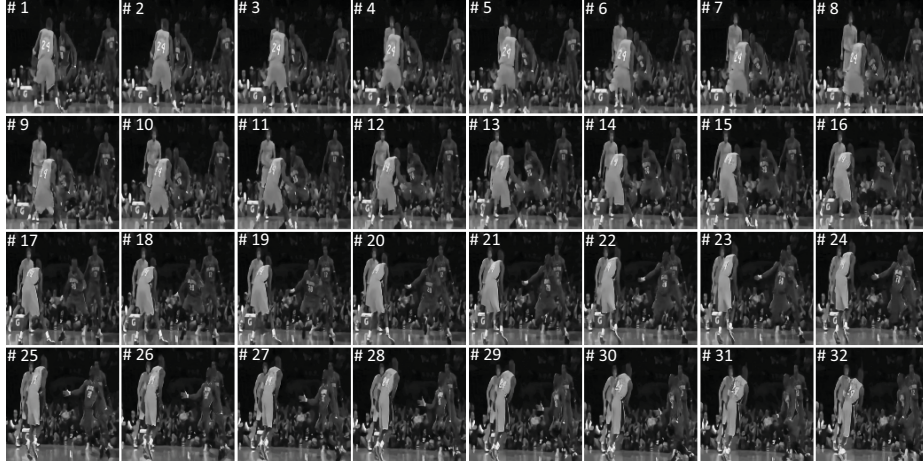

**Fig. 4.** Reconstructed results by our proposed BIRNAT for Kobe, PSNR: 32.71, SSIM: 0.9316.

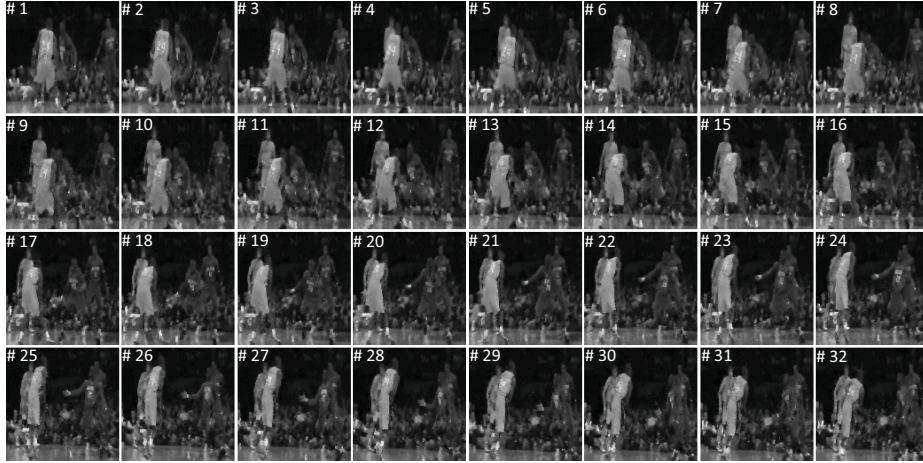

**Fig. 5.** Reconstructed results by GAP-TV for Kobe, PSNR: 26.45, SSIM: 0.8448.

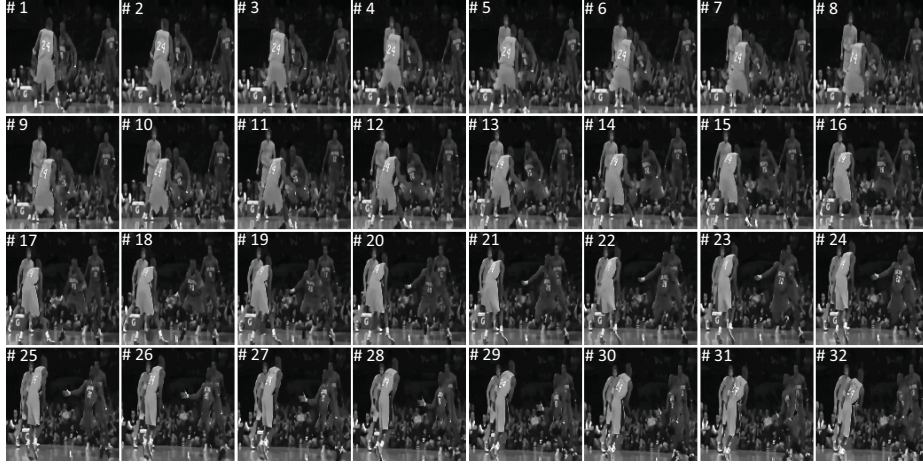

**Fig. 6.** Reconstructed results by DeSCI for Kobe, PSNR: 33.25, SSIM: 0.9518.

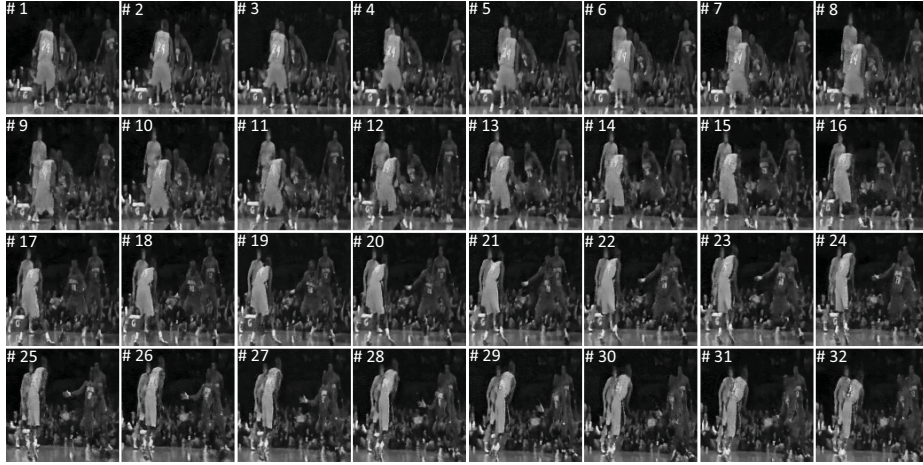

**Fig. 7.** Reconstructed results by U-net for Kobe, PSNR: 27.79, SSIM: 0.8071.



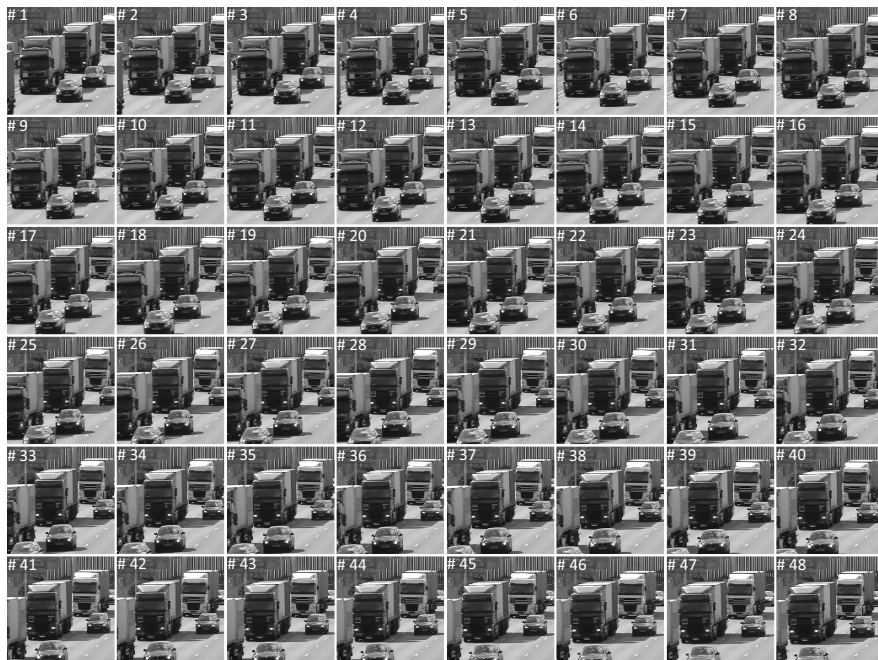

Fig. 8. Ground truth for Traffic.

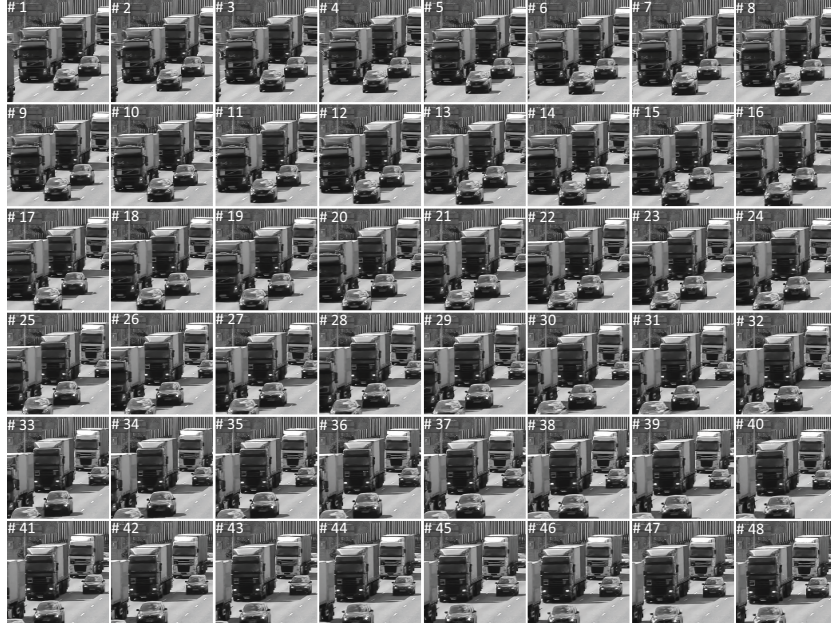

**Fig. 9.** Reconstructed results by our proposed BIRNAT for **Traffic**, PSNR: 29.33, SSIM: 0.9322.

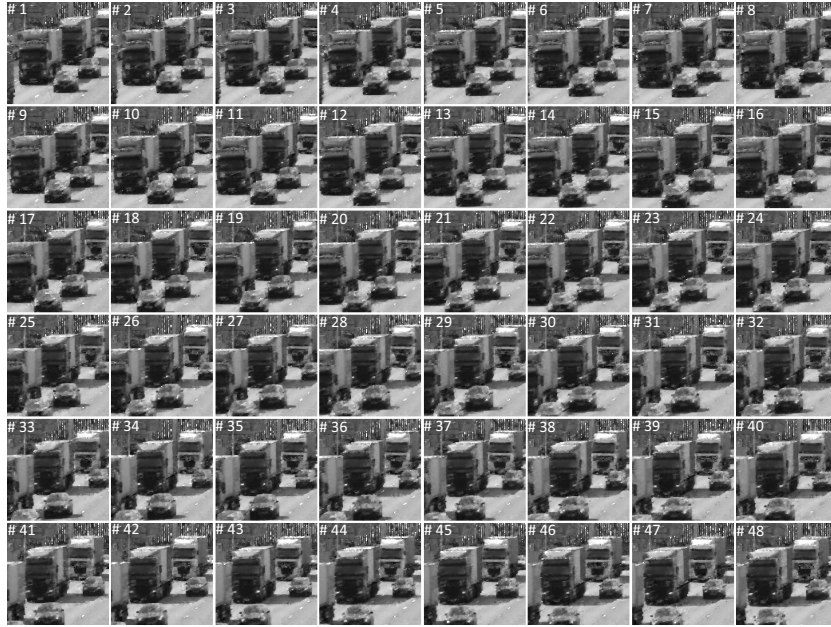

**Fig. 10.** Reconstructed results by GAP-TV for **Traffic**, PSNR: 20.89, SSIM: 0.7148.



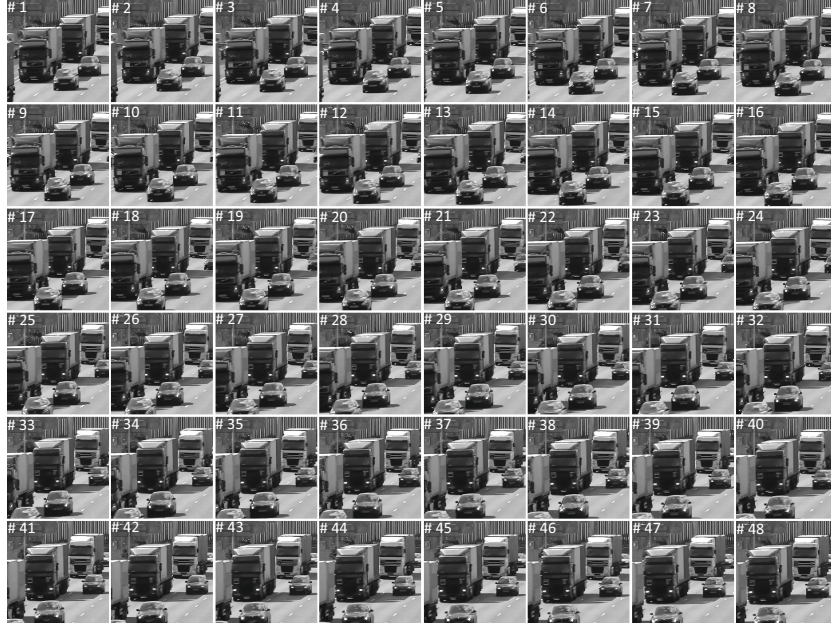

**Fig. 11.** Reconstructed results by DeSCI for **Traffic**, PSNR: 28.72, SSIM: 0.9250.

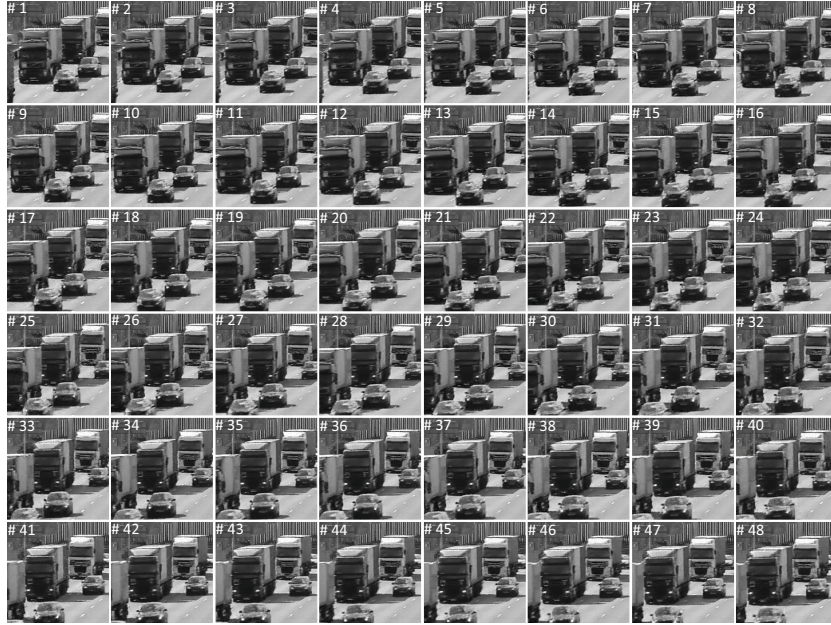

**Fig. 12.** Reconstructed results by U-net for **Traffic**, PSNR: 24.62, SSIM: 0.8403.

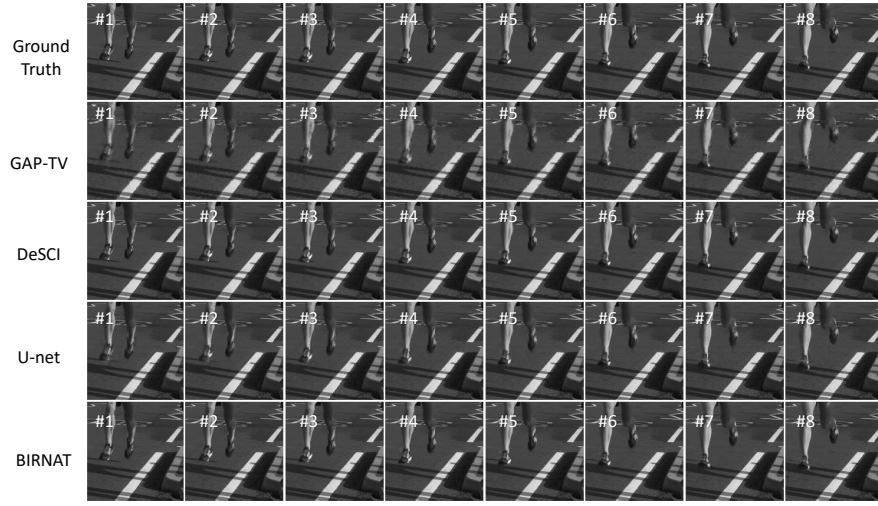

**Fig. 13.** Ground truth and reconstructed results by different methods on **Runner**. PSNR and SSIM: 28.81, 0.9092 (GAP-TV); 38.76, 0.9693 (DeSCI); 34.12, 0.9471 (U-net); 38.70, 0.9685 (our proposed BIRNAT).

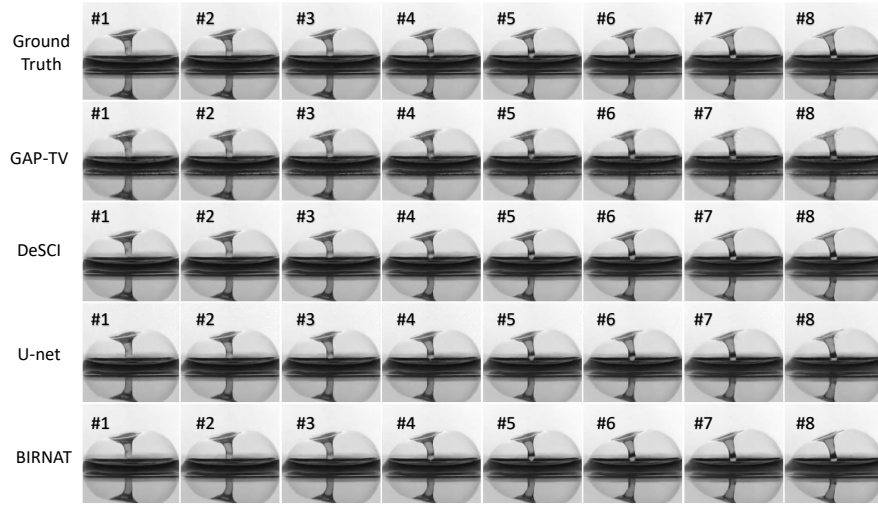

**Fig. 14.** Ground truth and reconstructed results by different methods on **Drop**, PSNR and SSIM: 34.74, 0.9704 (GAP-TV); 43.22, 0.9925 (DeSCI); 36.56, 0.9494 (U-net); 42.28, 0.9896 (our proposed BIRNAT).



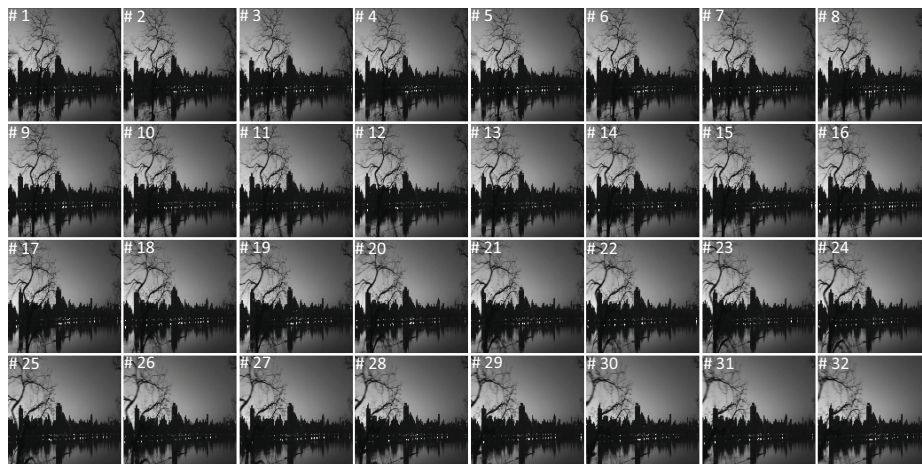

**Fig. 15.** Ground truth for Aerial.

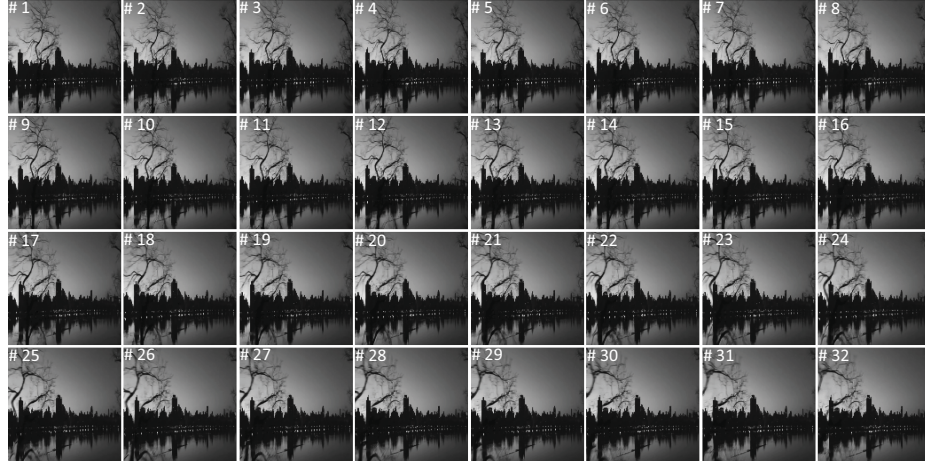

**Fig. 16.** Reconstructed results by our proposed BIRNAT for *Aerial*, PSNR: 28.99, SSIM: 0.9136.

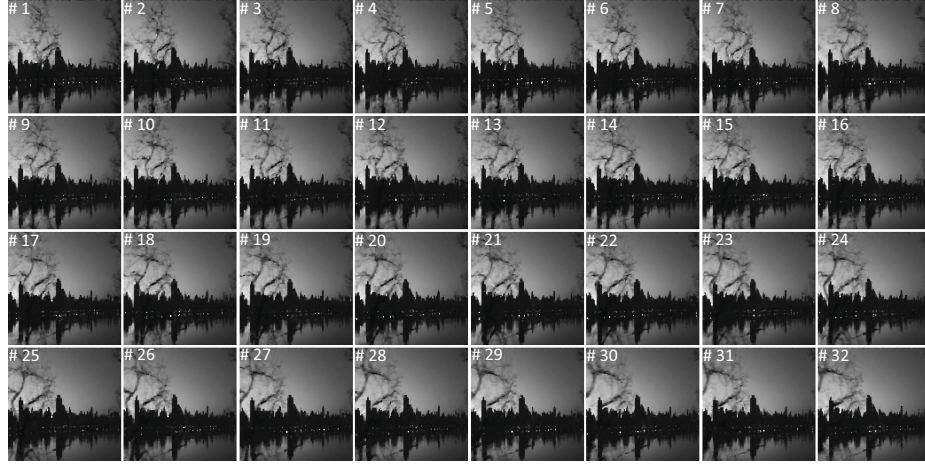

**Fig. 17.** Reconstructed results by GAP-TV for *Aerial*, PSNR: 25.05, SSIM: 0.8281.

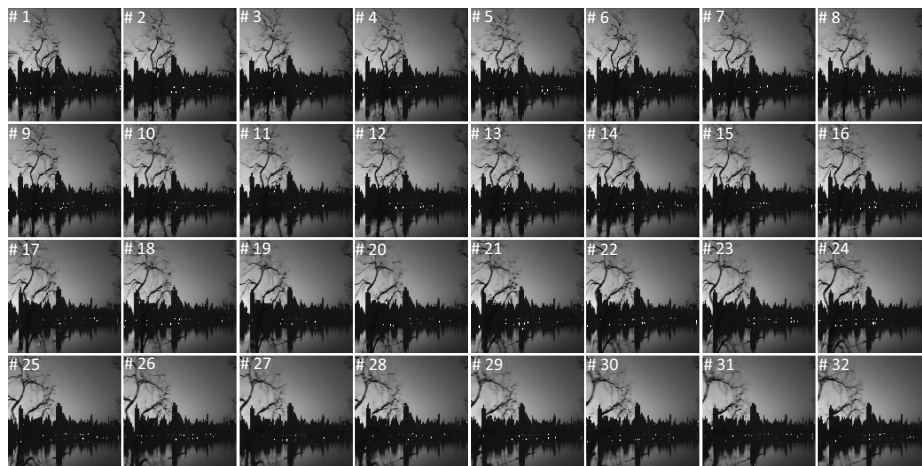

**Fig. 18.** Reconstructed results by DeSCI for Aerial, PSNR: 25.33, SSIM: 0.8603.

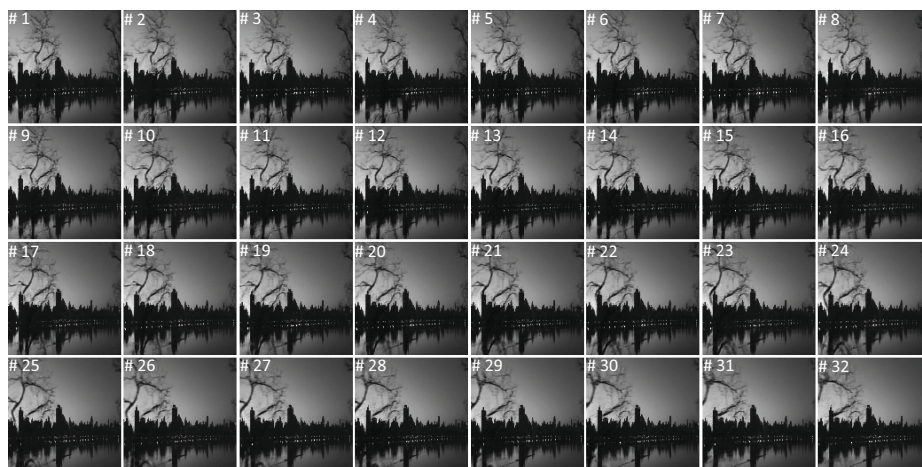

**Fig. 19.** Reconstructed results by U-net for Aerial, PSNR: 27.18, SSIM: 0.8690.

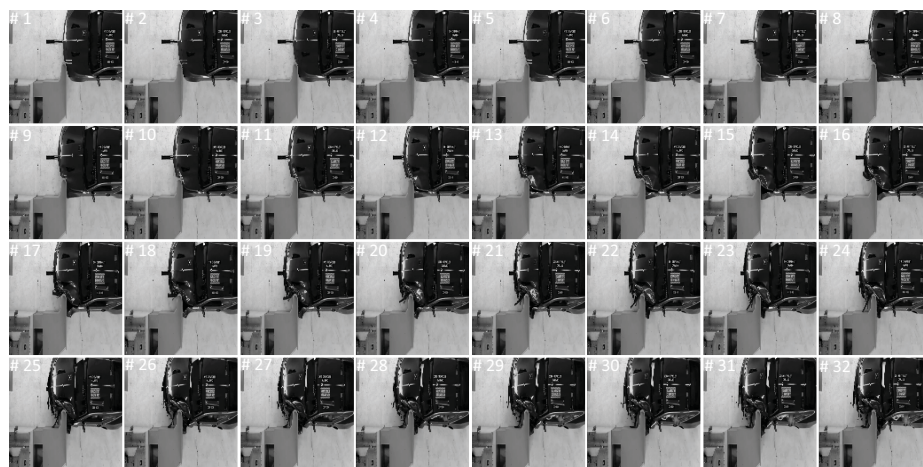

**Fig. 20.** Ground truth for Vehicle.



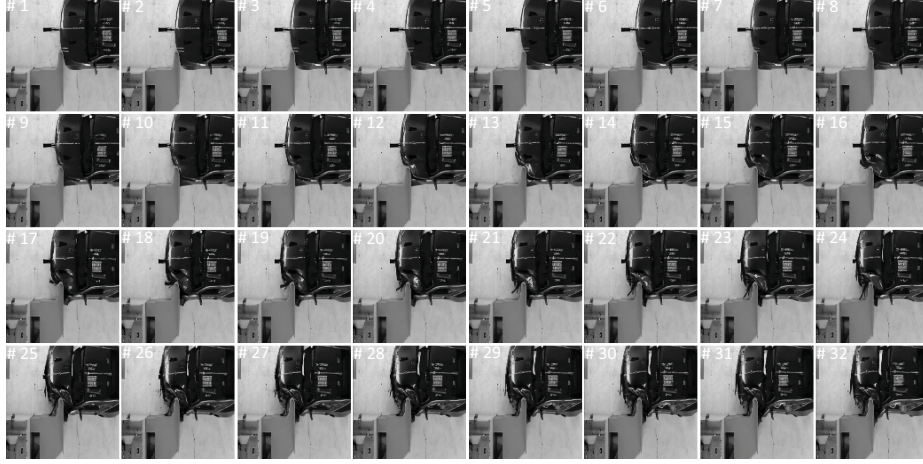

**Fig. 21.** Reconstructed results by our proposed BIRNAT for `Vehicle`, PSNR: 27.84, SSIM: 0.9092.

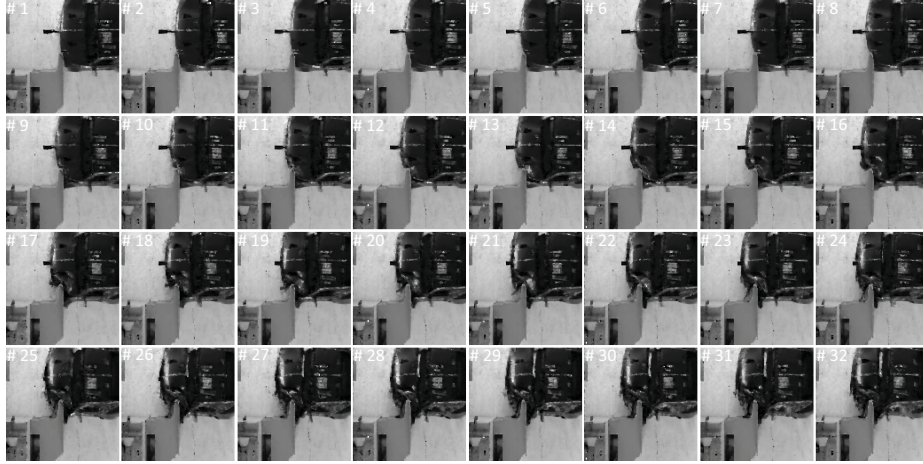

**Fig. 22.** Reconstructed results by GAP-TV for `Vehicle`, PSNR: 24.82, SSIM: 0.8383.

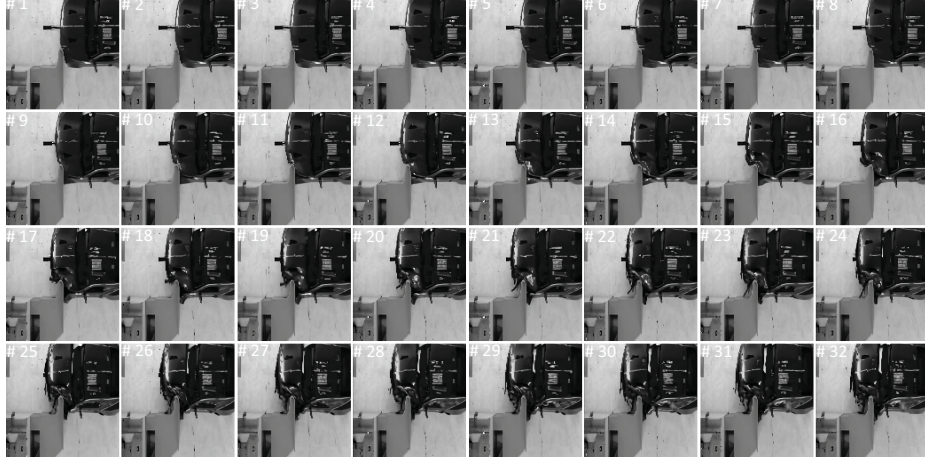

**Fig. 23.** Reconstructed results by DeSCI for `Vehicle`, PSNR: 27.04, SSIM: 0.9094.

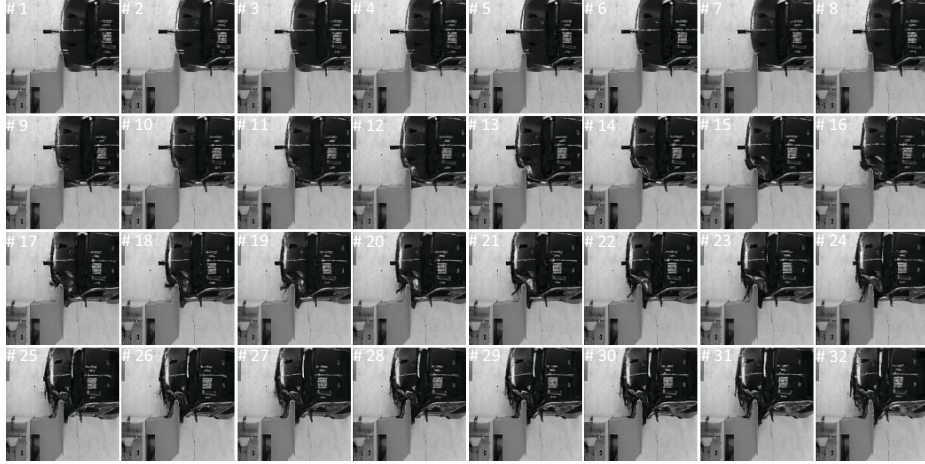

**Fig. 24.** Reconstructed results by U-net for `Vehicle`, PSNR: 26.43, SSIM: 0.8817.

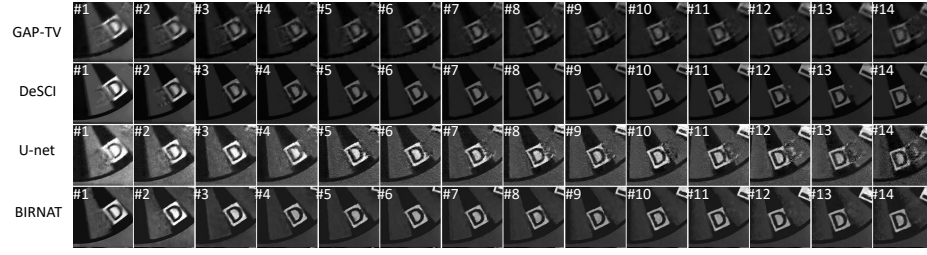

**Fig. 25.** The results of different methods on real data **Wheel**.

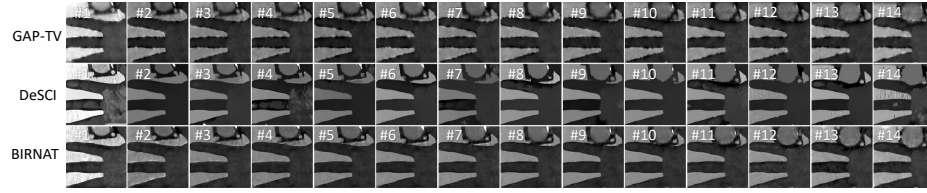

**Fig. 26.** The results of different methods on real data **Handlen**.

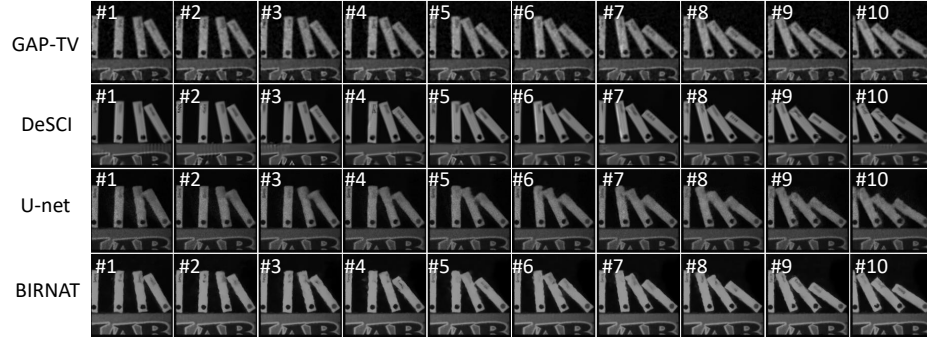

**Fig. 27.** The results of different methods on real data for Domino.

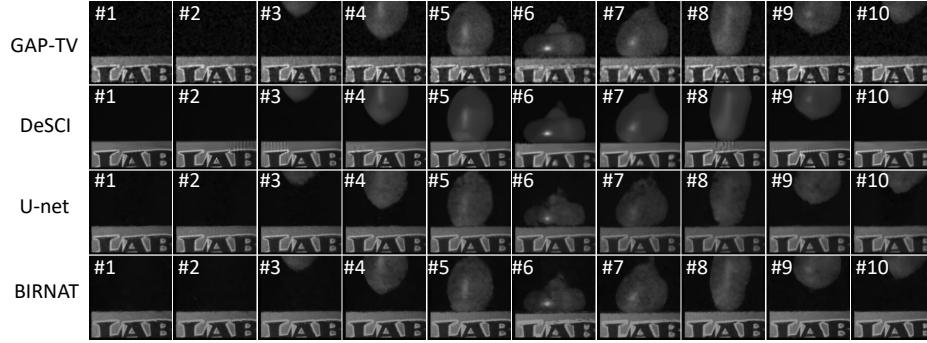

**Fig. 28.** The results of different methods on real data Water Balloon.
